# Supplementary material
Source: publisher figshare collection journal article supplement (https://karger.figshare.com/articles/dataset/_/5129857)
Supplement: Supplementary file 1 [file 1]

## Questionnaire

**Frage 1:** Weshalb haben Sie heute Ihren Arzt aufgesucht bzw. weshalb sind Sie in stationärer Betreuung?

☐ zur Therapie

☐ akut aufgetretenes Problem / notfallmäßige Vorstellung

☐ zur Nachsorge

☐ etwas anderes: [bitte eintragen](#)

**Frage 2:** Haben Sie bisher komplementäre oder alternative Heilverfahren begleitend oder anstelle der konventionellen Therapie eingesetzt?

☐ ja ☐ nein

Wenn „ja“, Listen Sie bitte auf welche Heilverfahren Sie begleitend oder anstelle der konventionellen Therapie einsetzen. Als Orientierung kann die Liste im Anhang dienen:

1. [bitte eintragen](#) \_\_\_\_\_

2. [bitte eintragen](#) \_\_\_\_\_

3. [bitte eintragen](#) \_\_\_\_\_

**Frage 3:** Verbessern die eingesetzten komplementären oder alternativen Heilverfahren Ihre Lebensqualität?

☐ Ja, weil [bitte eintragen](#)

☐ Nein, aber es verschlechtert sie auch nicht

☐ Nein, es belastet mich eher, weil ich

☐ das Gefühl habe zu wenig zu tun

☐ das Gefühl habe zu viel zu tun

☐ Zeit verliere, in der ich etwas anderes machen

**Frage 4:** Haben Sie mit Ihrem Hausarzt / Onkologen über den Einsatz alternativer oder komplementärer Behandlungsmethoden gesprochen?

☐ Nein (mit keinem der genannten)

☐ Ja

Wie hat der jeweilige Arzt reagiert?

Er hat mir zur alternativen oder komplementären Therapie geraten

Er hat meine Entscheidung zur Kenntnis genommen

Er hat mir von der alternativen bzw. komplementären Therapie abgeraten

Hausarzt    Onkologe

☐                    ☐

☐                    ☐

☐                    ☐

**Frage 5:** Wie schätzen Sie die Wirkung der angewandten alternativen oder komplementären Behandlungsmethoden auf Ihre Erkrankung ein? (Mehrfachnennungen möglich)

- ☐ Ich setze keine komplementären oder alternativen Heilverfahren ein
- ☐ Ich war dadurch körperlich stabiler
- ☐ Das Immunsystem wurde gestärkt
- ☐ Die Verträglichkeit der Chemotherapie, Bestrahlung bzw. Operation wurde verbessert
- ☐ Begleitsymptome der Erkrankung (z.B. Schmerzen) wurden gelindert
- ☐ Die Heilungschancen wurden verbessert
- ☐ Die alternative oder komplementäre Behandlungsmethode war wirkungslos
- ☐ Die alternative oder komplementäre Behandlungsmethode hat den Krankheitsverlauf negativ beeinflusst
- ☐ Ich kann die Wirkungen der alternativen oder komplementären Behandlungsmethoden nicht einschätzen

**Frage 6:** Wie viel haben Sie während der letzten drei Monate durchschnittlich im Monat für die alternativen oder komplementären Heilverfahren ausgegeben?

- |                                      |                                     |                                      |
|--------------------------------------|-------------------------------------|--------------------------------------|
| <input type="radio"/> keine Ausgaben | <input type="radio"/> bis zu 15 €   | <input type="radio"/> 16 bis 50 €    |
| <input type="radio"/> 51 bis 100 €   | <input type="radio"/> 101 bis 250 € | <input type="radio"/> mehr als 250 € |

**Frage 7:** Auf Grund von Gesundheitsproblemen werden verschiedene Berufsgruppen aus dem Bereich der komplementären und konventionellen Medizin aufgesucht. Diese Frage bezieht sich auf Besuche bei Ärzten, Heilpraktikern, Chiropraktikern, etc.:

| Haben Sie in den letzten 12 Monaten einen Vertreter der folgenden Berufsgruppen aufgesucht? |                          |                          |                                                    | Bitte beziehen Sie sich auf die Hauptursache für Ihren letzten Besuch (Bitte nur ein Kreuz) |                                           |                                 |                                                    | Wie hilfreich war dieser Besuch? (Bitte nur ein Kreuz) |                          |                          |                           |
|---------------------------------------------------------------------------------------------|--------------------------|--------------------------|----------------------------------------------------|---------------------------------------------------------------------------------------------|-------------------------------------------|---------------------------------|----------------------------------------------------|--------------------------------------------------------|--------------------------|--------------------------|---------------------------|
|                                                                                             | Ja                       | nein                     | Anzahl der Besuche innerhalb der letzten 3 Monate? | Auf Grund der Krebs- / Bluterkrankung                                                       | Auf Grund von Nebenwirkungen der Therapie | Um das Wohlbefinden zu steigern | einer anderen Ursache (Bitte tragen Sie diese ein) | sehr                                                   | etwas                    | gar nicht                | Kann ich nicht beurteilen |
| Arzt                                                                                        | <input type="checkbox"/> | <input type="checkbox"/> |                                                    | <input type="checkbox"/>                                                                    | <input type="checkbox"/>                  | <input type="checkbox"/>        |                                                    | <input type="checkbox"/>                               | <input type="checkbox"/> | <input type="checkbox"/> | <input type="checkbox"/>  |
| Chiropraktiker                                                                              | <input type="checkbox"/> | <input type="checkbox"/> |                                                    | <input type="checkbox"/>                                                                    | <input type="checkbox"/>                  | <input type="checkbox"/>        |                                                    | <input type="checkbox"/>                               | <input type="checkbox"/> | <input type="checkbox"/> | <input type="checkbox"/>  |
| Homöopath                                                                                   | <input type="checkbox"/> | <input type="checkbox"/> |                                                    | <input type="checkbox"/>                                                                    | <input type="checkbox"/>                  | <input type="checkbox"/>        |                                                    | <input type="checkbox"/>                               | <input type="checkbox"/> | <input type="checkbox"/> | <input type="checkbox"/>  |
| Akupunkteur                                                                                 | <input type="checkbox"/> | <input type="checkbox"/> |                                                    | <input type="checkbox"/>                                                                    | <input type="checkbox"/>                  | <input type="checkbox"/>        |                                                    | <input type="checkbox"/>                               | <input type="checkbox"/> | <input type="checkbox"/> | <input type="checkbox"/>  |
| Heilpraktiker                                                                               | <input type="checkbox"/> | <input type="checkbox"/> |                                                    | <input type="checkbox"/>                                                                    | <input type="checkbox"/>                  | <input type="checkbox"/>        |                                                    | <input type="checkbox"/>                               | <input type="checkbox"/> | <input type="checkbox"/> | <input type="checkbox"/>  |
| spiritueller Heiler                                                                         | <input type="checkbox"/> | <input type="checkbox"/> |                                                    | <input type="checkbox"/>                                                                    | <input type="checkbox"/>                  | <input type="checkbox"/>        |                                                    | <input type="checkbox"/>                               | <input type="checkbox"/> | <input type="checkbox"/> | <input type="checkbox"/>  |
| Psychoonkologe                                                                              | <input type="checkbox"/> | <input type="checkbox"/> |                                                    | <input type="checkbox"/>                                                                    | <input type="checkbox"/>                  | <input type="checkbox"/>        |                                                    | <input type="checkbox"/>                               | <input type="checkbox"/> | <input type="checkbox"/> | <input type="checkbox"/>  |
| Psychotherapeut                                                                             | <input type="checkbox"/> | <input type="checkbox"/> |                                                    | <input type="checkbox"/>                                                                    | <input type="checkbox"/>                  | <input type="checkbox"/>        |                                                    | <input type="checkbox"/>                               | <input type="checkbox"/> | <input type="checkbox"/> | <input type="checkbox"/>  |
| Anderer<br><u>bitte eintragen</u>                                                           | <input type="checkbox"/> | <input type="checkbox"/> |                                                    | <input type="checkbox"/>                                                                    | <input type="checkbox"/>                  | <input type="checkbox"/>        |                                                    | <input type="checkbox"/>                               | <input type="checkbox"/> | <input type="checkbox"/> | <input type="checkbox"/>  |
| Anderer<br><u>bitte eintragen</u>                                                           | <input type="checkbox"/> | <input type="checkbox"/> |                                                    | <input type="checkbox"/>                                                                    | <input type="checkbox"/>                  | <input type="checkbox"/>        |                                                    | <input type="checkbox"/>                               | <input type="checkbox"/> | <input type="checkbox"/> | <input type="checkbox"/>  |
| Anderer<br><u>bitte eintragen</u>                                                           | <input type="checkbox"/> | <input type="checkbox"/> |                                                    | <input type="checkbox"/>                                                                    | <input type="checkbox"/>                  | <input type="checkbox"/>        |                                                    | <input type="checkbox"/>                               | <input type="checkbox"/> | <input type="checkbox"/> | <input type="checkbox"/>  |

**Frage 8:** Einige Ärzte bieten sowohl konventionelle als auch komplementäre Heilverfahren an. Diese Frage bezieht sich auf komplementäre und alternative Heilverfahren, die vom Arzt verschrieben wurden:

| Haben Sie in den letzten 12 Monaten eine der folgenden komplementären oder alternativen Heilverfahren von Ihrem Arzt verschrieben bekommen? |                          |                          | Wie häufig haben Sie diese Behandlung in den letzten 3 Monaten erhalten? | Bitte beziehen Sie sich auf die Hauptursache für diese Behandlung (Bitte nur ein Kreuz) |                                           |                                 | einer anderen Ursache (Bitte tragen Sie diese ein) | Wie hilfreich war diese Behandlung? (Bitte nur ein Kreuz) |                          |                          |                           |
|---------------------------------------------------------------------------------------------------------------------------------------------|--------------------------|--------------------------|--------------------------------------------------------------------------|-----------------------------------------------------------------------------------------|-------------------------------------------|---------------------------------|----------------------------------------------------|-----------------------------------------------------------|--------------------------|--------------------------|---------------------------|
|                                                                                                                                             | Ja                       | nein                     |                                                                          | Auf Grund der Krebs- / Bluterkrankung                                                   | Auf Grund von Nebenwirkungen der Therapie | Um das Wohlbefinden zu steigern |                                                    | sehr                                                      | etwas                    | gar nicht                | Kann ich nicht beurteilen |
| Manipulation                                                                                                                                | <input type="checkbox"/> | <input type="checkbox"/> |                                                                          | <input type="checkbox"/>                                                                | <input type="checkbox"/>                  | <input type="checkbox"/>        |                                                    | <input type="checkbox"/>                                  | <input type="checkbox"/> | <input type="checkbox"/> | <input type="checkbox"/>  |
| Homöopathie                                                                                                                                 | <input type="checkbox"/> | <input type="checkbox"/> |                                                                          | <input type="checkbox"/>                                                                | <input type="checkbox"/>                  | <input type="checkbox"/>        |                                                    | <input type="checkbox"/>                                  | <input type="checkbox"/> | <input type="checkbox"/> | <input type="checkbox"/>  |
| Akupunktur                                                                                                                                  | <input type="checkbox"/> | <input type="checkbox"/> |                                                                          | <input type="checkbox"/>                                                                | <input type="checkbox"/>                  | <input type="checkbox"/>        |                                                    | <input type="checkbox"/>                                  | <input type="checkbox"/> | <input type="checkbox"/> | <input type="checkbox"/>  |
| Kräuter / Naturheilkunde                                                                                                                    | <input type="checkbox"/> | <input type="checkbox"/> |                                                                          | <input type="checkbox"/>                                                                | <input type="checkbox"/>                  | <input type="checkbox"/>        |                                                    | <input type="checkbox"/>                                  | <input type="checkbox"/> | <input type="checkbox"/> | <input type="checkbox"/>  |
| Spirituelle Behandlung                                                                                                                      | <input type="checkbox"/> | <input type="checkbox"/> |                                                                          | <input type="checkbox"/>                                                                | <input type="checkbox"/>                  | <input type="checkbox"/>        |                                                    | <input type="checkbox"/>                                  | <input type="checkbox"/> | <input type="checkbox"/> | <input type="checkbox"/>  |
| Andere<br><u>bitte eintragen</u>                                                                                                            | <input type="checkbox"/> | <input type="checkbox"/> |                                                                          | <input type="checkbox"/>                                                                | <input type="checkbox"/>                  | <input type="checkbox"/>        |                                                    | <input type="checkbox"/>                                  | <input type="checkbox"/> | <input type="checkbox"/> | <input type="checkbox"/>  |
| Andere<br><u>bitte eintragen</u>                                                                                                            | <input type="checkbox"/> | <input type="checkbox"/> |                                                                          | <input type="checkbox"/>                                                                | <input type="checkbox"/>                  | <input type="checkbox"/>        |                                                    | <input type="checkbox"/>                                  | <input type="checkbox"/> | <input type="checkbox"/> | <input type="checkbox"/>  |
| Andere<br><u>bitte eintragen</u>                                                                                                            | <input type="checkbox"/> | <input type="checkbox"/> |                                                                          | <input type="checkbox"/>                                                                | <input type="checkbox"/>                  | <input type="checkbox"/>        |                                                    | <input type="checkbox"/>                                  | <input type="checkbox"/> | <input type="checkbox"/> | <input type="checkbox"/>  |

**Frage 9:** Diese Frage bezieht sich auf den Einsatz von pflanzlichen Präparaten und Nahrungsergänzungsmitteln, einschließlich Tabletten, Kapseln und Tropfen:

| Bitte geben Sie in jeder Kategorie bis zu drei Produkte an, die Sie in den letzten 12 Monaten verwendet haben. | Anzahl der Anwendungen innerhalb der letzten 3 Monate? | Bitte beziehen Sie sich auf die Hauptursache für den letzten Einsatz (bitte nur ein Kreuz) |                                           |                                 |                                                    | Wie hilfreich war dieses Produkt? (Bitte nur ein Kreuz) |                          |                          |                           |
|----------------------------------------------------------------------------------------------------------------|--------------------------------------------------------|--------------------------------------------------------------------------------------------|-------------------------------------------|---------------------------------|----------------------------------------------------|---------------------------------------------------------|--------------------------|--------------------------|---------------------------|
|                                                                                                                |                                                        | Auf Grund der Krebs- / Bluterkrankung                                                      | Auf Grund von Nebenwirkungen der Therapie | Um das Wohlbefinden zu steigern | einer anderen Ursache (Bitte tragen Sie diese ein) | sehr                                                    | etwas                    | gar nicht                | Kann ich nicht beurteilen |
| Kräuter / naturheilkundliche oder pflanzliche Präparate                                                        |                                                        |                                                                                            |                                           |                                 |                                                    |                                                         |                          |                          |                           |
| <u>bitte eintragen</u>                                                                                         |                                                        | <input type="checkbox"/>                                                                   | <input type="checkbox"/>                  | <input type="checkbox"/>        |                                                    | <input type="checkbox"/>                                | <input type="checkbox"/> | <input type="checkbox"/> | <input type="checkbox"/>  |
| <u>bitte eintragen</u>                                                                                         |                                                        | <input type="checkbox"/>                                                                   | <input type="checkbox"/>                  | <input type="checkbox"/>        |                                                    | <input type="checkbox"/>                                | <input type="checkbox"/> | <input type="checkbox"/> | <input type="checkbox"/>  |
| <u>bitte eintragen</u>                                                                                         |                                                        | <input type="checkbox"/>                                                                   | <input type="checkbox"/>                  | <input type="checkbox"/>        |                                                    | <input type="checkbox"/>                                | <input type="checkbox"/> | <input type="checkbox"/> | <input type="checkbox"/>  |
| Vitamine / Mineralien                                                                                          |                                                        |                                                                                            |                                           |                                 |                                                    |                                                         |                          |                          |                           |
| <u>bitte eintragen</u>                                                                                         |                                                        | <input type="checkbox"/>                                                                   | <input type="checkbox"/>                  | <input type="checkbox"/>        |                                                    | <input type="checkbox"/>                                | <input type="checkbox"/> | <input type="checkbox"/> | <input type="checkbox"/>  |
| <u>bitte eintragen</u>                                                                                         |                                                        | <input type="checkbox"/>                                                                   | <input type="checkbox"/>                  | <input type="checkbox"/>        |                                                    | <input type="checkbox"/>                                | <input type="checkbox"/> | <input type="checkbox"/> | <input type="checkbox"/>  |
| <u>bitte eintragen</u>                                                                                         |                                                        | <input type="checkbox"/>                                                                   | <input type="checkbox"/>                  | <input type="checkbox"/>        |                                                    | <input type="checkbox"/>                                | <input type="checkbox"/> | <input type="checkbox"/> | <input type="checkbox"/>  |
| Homöopathische Präparate                                                                                       |                                                        |                                                                                            |                                           |                                 |                                                    |                                                         |                          |                          |                           |
| <u>bitte eintragen</u>                                                                                         |                                                        | <input type="checkbox"/>                                                                   | <input type="checkbox"/>                  | <input type="checkbox"/>        |                                                    | <input type="checkbox"/>                                | <input type="checkbox"/> | <input type="checkbox"/> | <input type="checkbox"/>  |
| <u>bitte eintragen</u>                                                                                         |                                                        | <input type="checkbox"/>                                                                   | <input type="checkbox"/>                  | <input type="checkbox"/>        |                                                    | <input type="checkbox"/>                                | <input type="checkbox"/> | <input type="checkbox"/> | <input type="checkbox"/>  |
| <u>bitte eintragen</u>                                                                                         |                                                        | <input type="checkbox"/>                                                                   | <input type="checkbox"/>                  | <input type="checkbox"/>        |                                                    | <input type="checkbox"/>                                | <input type="checkbox"/> | <input type="checkbox"/> | <input type="checkbox"/>  |
| Andere Produkte                                                                                                |                                                        |                                                                                            |                                           |                                 |                                                    |                                                         |                          |                          |                           |
| <u>bitte eintragen</u>                                                                                         |                                                        | <input type="checkbox"/>                                                                   | <input type="checkbox"/>                  | <input type="checkbox"/>        |                                                    | <input type="checkbox"/>                                | <input type="checkbox"/> | <input type="checkbox"/> | <input type="checkbox"/>  |
| <u>bitte eintragen</u>                                                                                         |                                                        | <input type="checkbox"/>                                                                   | <input type="checkbox"/>                  | <input type="checkbox"/>        |                                                    | <input type="checkbox"/>                                | <input type="checkbox"/> | <input type="checkbox"/> | <input type="checkbox"/>  |

**Frage 10:** Diese Frage bezieht sich auf Selbsthilfe-Methoden:

| Haben Sie in den letzten 12 Monaten eine der folgenden Selbsthilfe-Methoden angewandt? |                          |                          | Wie häufig haben Sie diese Methode in den letzten 3 Monaten angewandt? | Bitte beziehen Sie sich auf den Hauptgrund für die letzte Anwendung (Bitte nur ein Kreuz) |                                           |                                 |                                                    | Wie hilfreich war diese Anwendung? (Bitte nur ein Kreuz) |                          |                          |                           |
|----------------------------------------------------------------------------------------|--------------------------|--------------------------|------------------------------------------------------------------------|-------------------------------------------------------------------------------------------|-------------------------------------------|---------------------------------|----------------------------------------------------|----------------------------------------------------------|--------------------------|--------------------------|---------------------------|
|                                                                                        | Ja                       | nein                     |                                                                        | Auf Grund der Krebs- / Bluterkrankung                                                     | Auf Grund von Nebenwirkungen der Therapie | Um das Wohlbefinden zu steigern | einer anderen Ursache (Bitte tragen Sie diese ein) | sehr                                                     | etwas                    | gar nicht                | Kann ich nicht beurteilen |
| Meditation                                                                             | <input type="checkbox"/> | <input type="checkbox"/> |                                                                        | <input type="checkbox"/>                                                                  | <input type="checkbox"/>                  | <input type="checkbox"/>        |                                                    | <input type="checkbox"/>                                 | <input type="checkbox"/> | <input type="checkbox"/> | <input type="checkbox"/>  |
| Yoga                                                                                   | <input type="checkbox"/> | <input type="checkbox"/> |                                                                        | <input type="checkbox"/>                                                                  | <input type="checkbox"/>                  | <input type="checkbox"/>        |                                                    | <input type="checkbox"/>                                 | <input type="checkbox"/> | <input type="checkbox"/> | <input type="checkbox"/>  |
| Qigong                                                                                 | <input type="checkbox"/> | <input type="checkbox"/> |                                                                        | <input type="checkbox"/>                                                                  | <input type="checkbox"/>                  | <input type="checkbox"/>        |                                                    | <input type="checkbox"/>                                 | <input type="checkbox"/> | <input type="checkbox"/> | <input type="checkbox"/>  |
| Tai Chi                                                                                | <input type="checkbox"/> | <input type="checkbox"/> |                                                                        | <input type="checkbox"/>                                                                  | <input type="checkbox"/>                  | <input type="checkbox"/>        |                                                    | <input type="checkbox"/>                                 | <input type="checkbox"/> | <input type="checkbox"/> | <input type="checkbox"/>  |
| Entspannungs-Techniken                                                                 | <input type="checkbox"/> | <input type="checkbox"/> |                                                                        | <input type="checkbox"/>                                                                  | <input type="checkbox"/>                  | <input type="checkbox"/>        |                                                    | <input type="checkbox"/>                                 | <input type="checkbox"/> | <input type="checkbox"/> | <input type="checkbox"/>  |
| Visualisierungen                                                                       | <input type="checkbox"/> | <input type="checkbox"/> |                                                                        | <input type="checkbox"/>                                                                  | <input type="checkbox"/>                  | <input type="checkbox"/>        |                                                    | <input type="checkbox"/>                                 | <input type="checkbox"/> | <input type="checkbox"/> | <input type="checkbox"/>  |
| Teilnahme an traditioneller Heilungs-Zeremonie                                         | <input type="checkbox"/> | <input type="checkbox"/> |                                                                        | <input type="checkbox"/>                                                                  | <input type="checkbox"/>                  | <input type="checkbox"/>        |                                                    | <input type="checkbox"/>                                 | <input type="checkbox"/> | <input type="checkbox"/> | <input type="checkbox"/>  |
| Beten für die eigene Gesundheit                                                        | <input type="checkbox"/> | <input type="checkbox"/> |                                                                        | <input type="checkbox"/>                                                                  | <input type="checkbox"/>                  | <input type="checkbox"/>        |                                                    | <input type="checkbox"/>                                 | <input type="checkbox"/> | <input type="checkbox"/> | <input type="checkbox"/>  |
| Andere<br><u>bitte eintragen</u>                                                       | <input type="checkbox"/> | <input type="checkbox"/> |                                                                        | <input type="checkbox"/>                                                                  | <input type="checkbox"/>                  | <input type="checkbox"/>        |                                                    | <input type="checkbox"/>                                 | <input type="checkbox"/> | <input type="checkbox"/> | <input type="checkbox"/>  |
| Andere<br><u>bitte eintragen</u>                                                       | <input type="checkbox"/> | <input type="checkbox"/> |                                                                        | <input type="checkbox"/>                                                                  | <input type="checkbox"/>                  | <input type="checkbox"/>        |                                                    | <input type="checkbox"/>                                 | <input type="checkbox"/> | <input type="checkbox"/> | <input type="checkbox"/>  |

**Frage 11:** Geschlecht:    ☐ weiblich    ☐ männlich

**Frage 12:** Alter: bitte eintragen \_\_\_\_\_

**Frage 13:** Welche Tumor- oder Bluterkrankung haben Sie?  
bitte eintragen \_\_\_\_\_

**Frage 14:** Falls bei Ihnen eine Tumorerkrankung vorliegt:

Sind bei Ihrer Erkrankung Metastasen bekannt?    ☐ ja    ☐ nein

**Frage 15:** Wie lange haben Sie diese Erkrankung schon? bitte eintragen \_\_\_\_\_

**Frage 16:** Welche Art der Therapie erhielten Sie innerhalb der letzten 3 Monate?

- ☐ eine Chemotherapie (inklusive Antikörper-Therapie)
  - ☐ adjuvante Chemotherapie (nach einer Operation, um einem Rückfall der Erkrankung vorzubeugen)
  - ☐ neoadjuvante Chemotherapie (vor einer geplanten Operation)
  - ☐ andere Art der Chemotherapie
- ☐ Strahlentherapie
- ☐ Therapiepause
- ☐ Nachsorge
- ☐ andere Therapieform: bitte eintragen \_\_\_\_\_
- ☐ gar keine Therapie

**Frage 17:** Bitte geben Sie an, was Ihre aktuelle tägliche Aktivität am besten beschreibt:

- ☐ überhaupt nicht eingeschränkt
- ☐ etwas eingeschränkt, mit leichten Symptomen
- ☐ mehr als 50% des Tages bettlägerig
- ☐ den ganzen Tag bettlägerig

**Frage 18:** Bitte geben Sie Auskunft über Ihren Bildungsstand:

- ☐ kein Schulabschluss
- ☐ Hauptschulabschluss
- ☐ Realschulabschluss
- ☐ Fachabitur / Abitur
- ☐ (Fach-) Hochschulabschluss
- ☐ abgeschlossene Ausbildung
- ☐ etwas anderes: bitte eintragen \_\_\_\_\_

**Frage 19:** Sind Sie religiös?

- ☐ ja    ☐ nein

**Frage 20:** Wie hoch ist ihr monatliches Nettoeinkommen?

(Diese Angabe ermöglicht eine Einschätzung der Ausgaben für alternative oder komplementäre Behandlungsmethoden im Bezug auf die finanziellen Möglichkeiten)

- ☐ unter 1000€                      ☐ 1000 – 2000 €
- ☐ 2000 – 3000 €                ☐ 3000 – 4000 €
- ☐ über 4000 €
